# Supplementary material
Source: PubMed Central journal article supplement (PMC10195683)
Supplement: sj-pdf-1-pmj-10.1177_02692163231175693.pdf [file sj-pdf-1-pmj-10.1177_02692163231175693.pdf]

## Appendix 1: Bereaved Family Survey Free Response Questions

1. *Is there anything else that you would like to share about [PATIENT'S] care during the last month of life?*

---

---

---

2. *Is there anything else that you would like to share about how the care could have been improved for [NAME]?*

---

---

---

3. *Is there anything else that you would like to share?*

---

---

---
